# Supplementary material
Source: MDPI journal article supplement (https://www.mdpi.com/2073-4344/10/5/485)
Supplement: s1 [file s1]

# Effect of Reduction Atmosphere on Structure and Catalytic Performance of PtIn/Mg(Al)O/ZnO for Propane Dehydrogenation

Ming Zhang<sup>1</sup>, Zhen Song<sup>1</sup>, Mengquan Guo<sup>1</sup>, Xiangxiang Li<sup>1</sup>, Yanjun Lin<sup>2\*</sup> and Lihong Zhang<sup>1\*</sup>

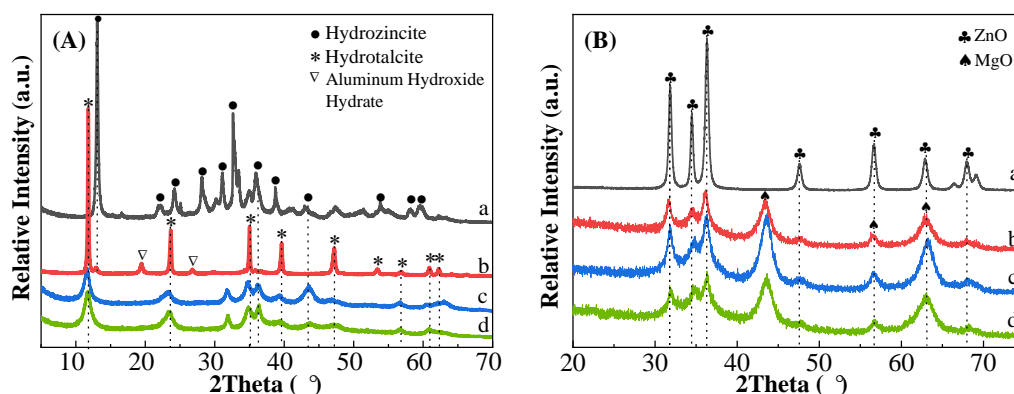

**Figure S1.** XRD patterns of precursors (A) and the corresponding calcined samples (B): (a) ZnO; (b) MAZ; (c) In/MAZ; (d) PtIn/MAZ.

According to the Figure S1(A), the single hydrozincite phase (JCPDS file No. 19-1458) is confirmed from the characteristic diffraction peaks. After hydrothermal treatment with the mixture solution of magnesium nitrate and aluminum nitrate, the strong characteristic diffraction peaks of hydrotalcite-like phase (HT, JCPDS file No. 35-0964) can be detected along with the appearance of some weak diffraction peaks of aluminum hydroxide hydrate (JCPDS file No. 39-0685) except the residual hydrozincite peak at low 2-theta degree. It indicates the MgAl(Zn)-HT is the main crystalline phase on the surface of hydrozincite. After two-step impregnating the calcined product with indium nitrate aqueous solution and chloroplatinic acid aqueous solution, some weak HT diffraction peaks can be indexed for In/MAZ and PtIn/MAZ precursor, suggesting the lattice distortion due to the influence of  $\text{In}^{3+}$  and  $\text{Pt}^{4+}$  ions. In addition, a slight shift can be seen for their (003) and (006) peak diffractions, this means that the  $\text{In}^{3+}$  and  $\text{Pt}^{4+}$  ions can be introduced into the reconstruction HT layer[1, 2]. As shown in

Figure S1(B), the hydrozincite phase can be successfully transformed into single ZnO phase (JCPDS file No. 75-0576), and the other samples present the diffraction peaks of MgO phase (JCPDS file No. 87-0651) after calcination. The Al<sub>2</sub>O<sub>3</sub> diffraction peaks cannot be found, which is believed to be retained and located in interstitial sites in the MgO framework after calcination[3].

**Table S1.** Comparison of the catalytic performance of some state-of-the-art catalysts used in propane dehydrogenation.

| Catalysts                    | Pt<br>loading<br>(wt.%) | Reduction                      |      |      | Reaction<br>temp<br>(°C) | WHSV<br>(h <sup>-1</sup> ) | X <sub>i</sub> <sup>a</sup><br>(%) | Y <sub>i</sub> <sup>b</sup><br>(%) | Stable<br>time <sup>c</sup><br>(h) |
|------------------------------|-------------------------|--------------------------------|------|------|--------------------------|----------------------------|------------------------------------|------------------------------------|------------------------------------|
|                              |                         | conditions                     |      |      |                          |                            |                                    |                                    |                                    |
|                              |                         | gas                            | temp | Time |                          |                            |                                    |                                    |                                    |
|                              |                         |                                | (°C) | (h)  |                          |                            |                                    |                                    |                                    |
| PtIn/Mg(Al)O <sup>[4]</sup>  | 0.6                     | H <sub>2</sub>                 | 580  | 2.5  | 620                      | 3.3                        | 37 - 57                            | 93 - 96                            | 12                                 |
| Pt3Ga/CeAl <sup>[5]</sup>    | 1.0                     | H <sub>2</sub> /N <sub>2</sub> | 500  | 1.0  | 600                      | 10.0                       | 41 - 33                            | 99                                 | 10                                 |
| 15Zn0.1Pt/Al <sup>[6]</sup>  | 0.1                     | N <sub>2</sub>                 | 600  | -    | 600                      | 3.0                        | 35 - 31                            | 94 - 97                            | 4                                  |
| PtCu/CeMgAl <sup>[2]</sup>   | 0.6                     | H <sub>2</sub> /N <sub>2</sub> | 580  | 2.5  | 600                      | 3.0                        | 62 - 44                            | 70 - 90                            | 7                                  |
| PtSnK/ZSM-5 <sup>[7]</sup>   | 0.5                     | H <sub>2</sub>                 | 500  | 8.0  | 590                      | 3.0                        | 34 - 33                            | 92 - 93                            | 8                                  |
| PtSnNa/Ce-MA <sup>d[8]</sup> | 0.5                     | H <sub>2</sub>                 | 500  | 8.0  | 590                      | 3.0                        | 34 - 28                            | 85 - 96                            | 6                                  |
| PtIn/MAZ <sup>e</sup>        | 0.5                     | H <sub>2</sub> /N <sub>2</sub> | 600  | 2.5  | 600                      | 3.0                        | 32 - 51                            | 97 - 92                            | 25                                 |

<sup>a</sup> Propane conversion: "initial – highest or stable".

<sup>b</sup> Propylene selectivity: "initial – stable".

<sup>c</sup> The time of propane conversion higher than 40% or stable at a certain level when it is below than 40%.

<sup>d</sup> The synthetic mesoporous alumina (MA).

<sup>e</sup> The catalyst in this work.

---

---

## References

- 1 Li, J., Zhang, M., Song, Z., Liu, S., Wang, J., Zhang, L. Hierarchical PtIn/Mg(Al)O Derived from Reconstructed PtIn-hydrotalcite-like Compounds for Highly Efficient Propane Dehydrogenation. *Catalysts* 2019(9), 767. Doi: 10.3390/catal9090767
- 2 Li, Y., Li, J., Yang, X., Wang, X., Xu, Y., Zhang, L. Preparation of CeO<sub>2</sub>-Modified Mg(Al)O-Supported Pt-Cu Alloy Catalysts Derived from Hydrotalcite-Like Precursors and Their Catalytic Behavior for Direct Dehydrogenation of Propane. *Transactions of Tianjin University* 2019, 25, 169–184. Doi: 10.1007/s12209-018-0156-4
- 3 Galvita, V., Siddiqi, G., Sun, P., Bell, A.T. Ethane dehydrogenation on Pt/Mg(Al)O and PtSn/Mg(Al)O catalysts. *J Catal* 2010, 271(2), 209-219. Doi: <https://doi.org/10.1016/j.jcat.2010.01.016>
- 4 Shen, L., Xia, K., Lang, W., Chu, L., Yan, X., Guo, Y. The effects of calcination temperature of support on PtIn/Mg(Al)O catalysts for propane dehydrogenation reaction. *Chem Eng J* 2017, 324, 336-346. Doi: 10.1016/j.cej.2017.05.058
- 5 Wang, T., Jiang, F., Liu, G., Zeng, L., Zhao, Z.J., Gong, J. Effects of Ga doping on Pt/CeO<sub>2</sub>-Al<sub>2</sub>O<sub>3</sub> catalysts for propane dehydrogenation. *Aiche J* 2016, 62(12), 4365-4376. Doi: 10.1002/aic.15339
- 6 Liu, G., Zeng, L., Zhao, Z., Tian, H., Wu, T., Gong, J. Platinum-Modified ZnO/Al<sub>2</sub>O<sub>3</sub> for Propane Dehydrogenation: Minimized Platinum Usage and Improved Catalytic Stability. *Acs Catal* 2016, 6(4), 2158-2162. Doi: 10.1021/acscatal.5b02878
- 7 Zhang, Y., Zhou, Y., Zhang, S., Zhou, S., Sheng, X., Wang, Q., Zhang, C. Catalytic structure and reaction performance of PtSnK/ZSM-5 catalyst for propane dehydrogenation: influence of impregnation strategy. *J Mater Sci* 2015, 50(19), 6457-6468. Doi: 10.1007/s10853-015-9201-z
- 8 Zhou, S., Zhou, Y., Shi, J., Zhang, Y., Sheng, X., Zhang, Z. Synthesis of Ce-doped mesoporous  $\gamma$ -alumina with enhanced catalytic performance for propane dehydrogenation. *J Mater Sci* 2015, 11(50), 3984-3993. Doi: 10.1007/s10853-015-8954-8
